# Supplementary material for: Nonsense-mediated mRNA decay factor UPF1 promotes aggresome formation
Source: PubMed Central journal article supplement (PMC7305299; doi:10.1038/s41467-020-16939-6), 2020-06-19
Supplement: 41467_2020_16939_MOESM1_ESM.pdf [file 41467_2020_16939_MOESM1_ESM.pdf]

## **Supplementary Information**

**Nonsense-mediated mRNA decay factor UPF1 promotes aggresome formation**

**Park et al.**

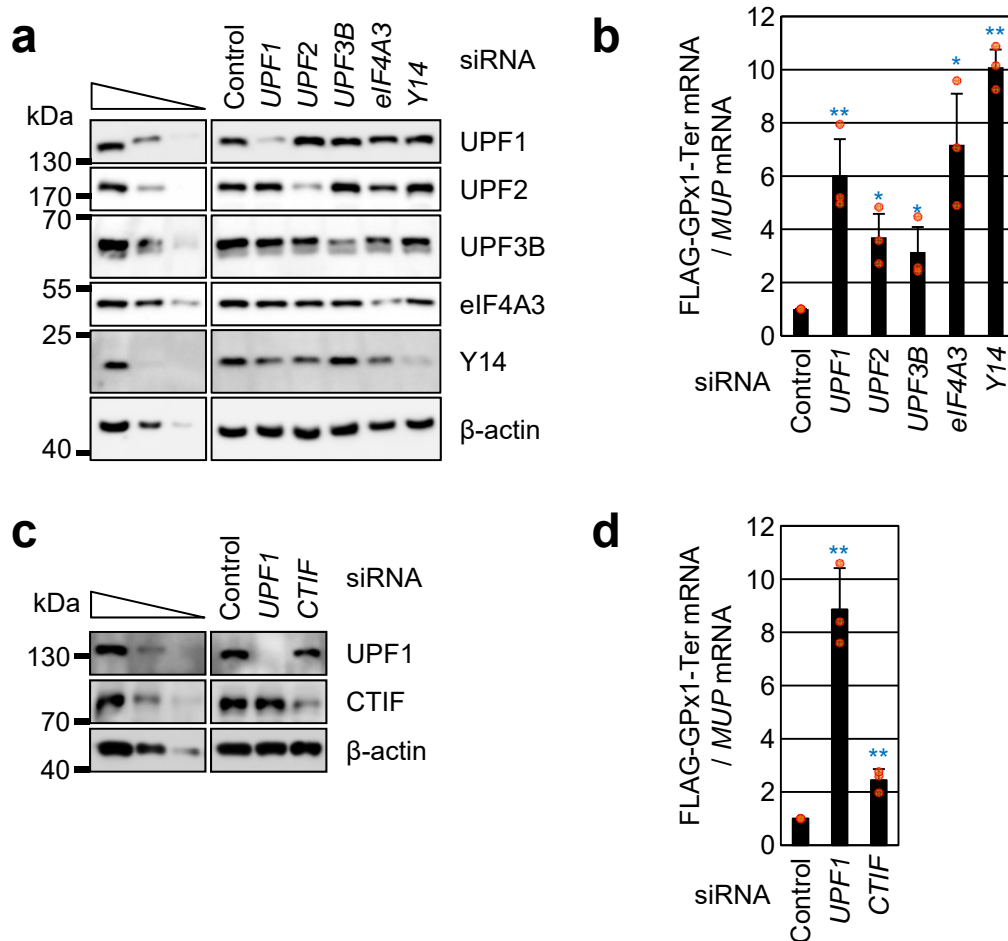

**Supplementary Fig. 1** FLAG-GPx1-Ter mRNAs are efficiently degraded by NMD. HeLa cells depleted of the indicated proteins were transfected with an NMD reporter plasmid expressing either FLAG-GPx1-Norm or -Ter and a reference plasmid expressing *MUP* mRNA. **a, c** Western blots illustrating specific downregulation of the endogenous proteins by siRNAs. **b, d** Relative levels of NMD reporter mRNAs determined by qRT-PCRs. Amounts of FLAG-GPx1-Norm or -Ter mRNAs were normalized to the levels of *MUP* mRNAs. The relative ratio of the normalized FLAG-GPx1-Ter mRNA amount to the normalized FLAG-GPx1-Norm mRNA amount in the undepleted cells was arbitrarily set to 1.0. Data are presented as mean values  $\pm$  SD. Two-tailed, equal-sample variance Student's *t* test was carried out to calculate the *P* values. \**P* = 0.0119 (*UPF2* siRNA), 0.0313 (*UPF3B* siRNA) and 0.0103 (*eIF4A3* siRNA); \*\**P* = 0.0063 (*UPF1* siRNA in panel **b**), 0.0009 (*UPF1* siRNA in panel **d**), and 0.0039 (*CTIF* siRNA); \*\*\**P* < 0.0000 (*Y14* siRNA). The exact *P* values are provided in a Source Data File; *n* = 3; Source data are provided as a Source Data File.

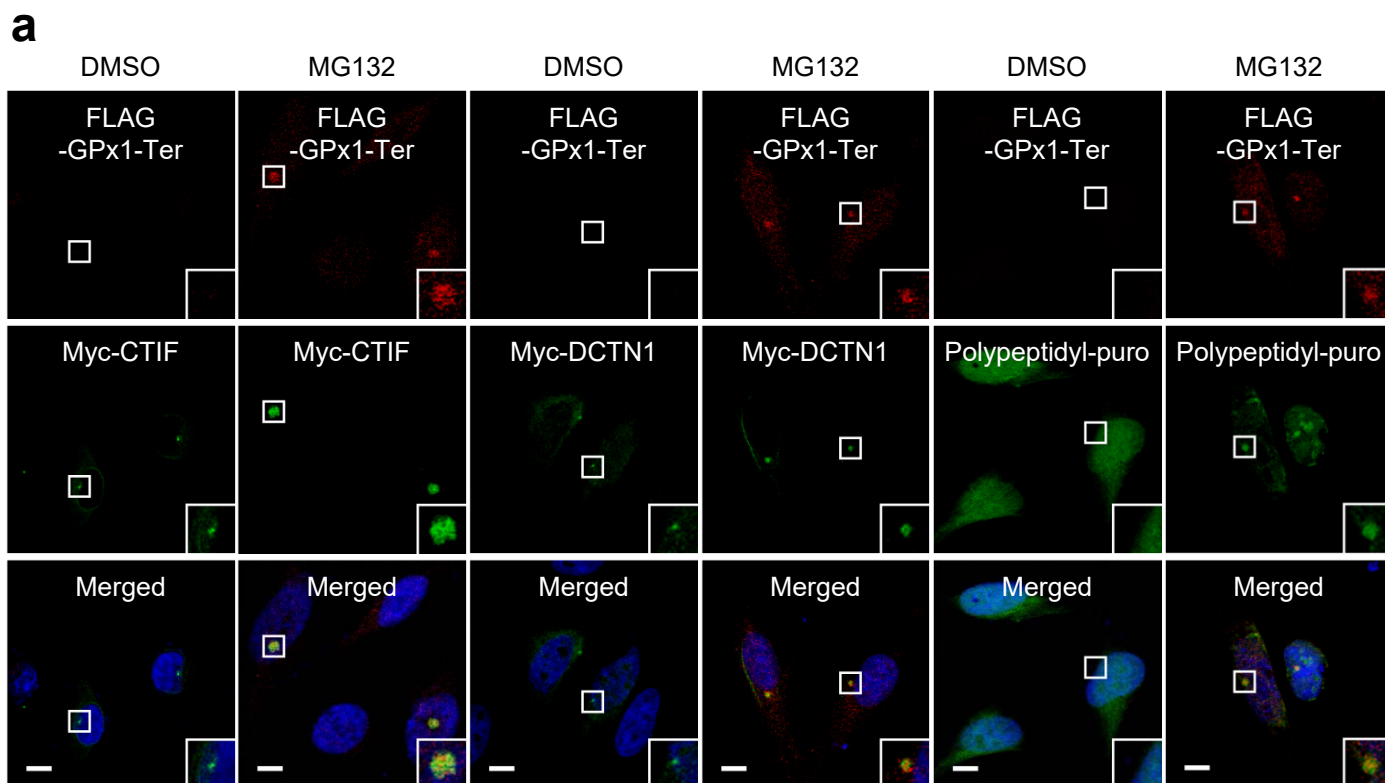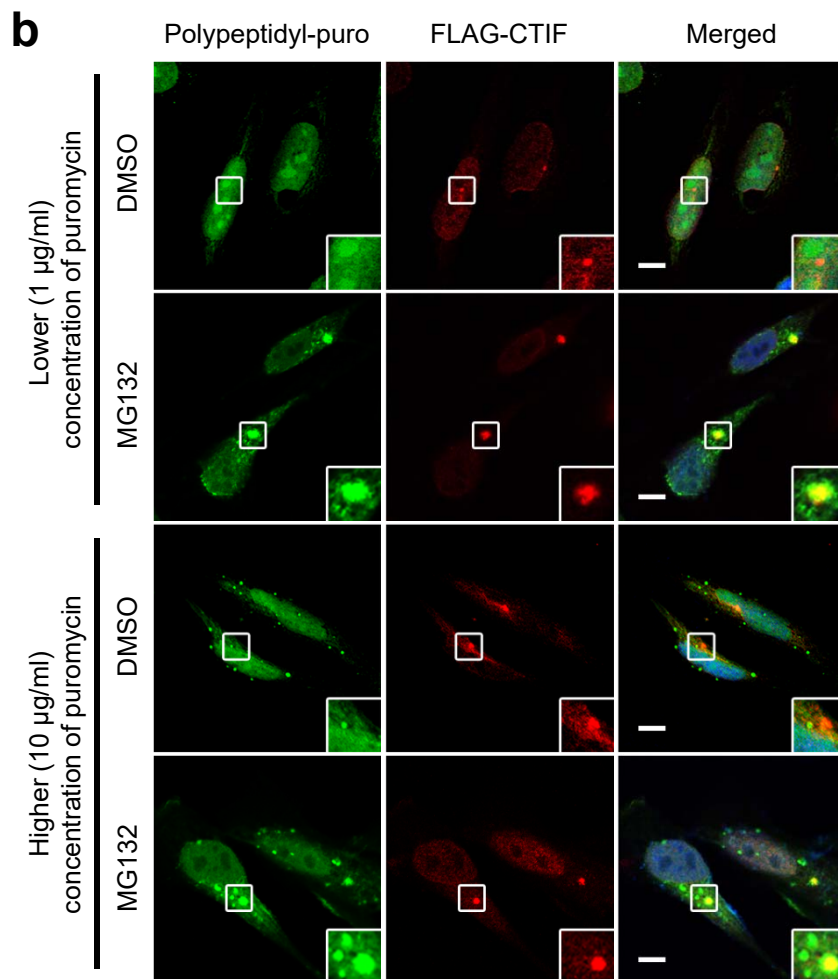

**Supplementary Fig. 2** FLAG-GPx1-Ter polypeptides colocalize with aggresome-targeting factors or aggresomal proteins. **a** Immunostaining of the FLAG-GPx1-Ter polypeptides (red) and aggresome-targeting factors or aggresomal protein (green) in HeLa cells. The cells were treated with either DMSO or MG132 for 12 h and with puromycin for 1 h before immunostaining. Scale bar, 10  $\mu\text{m}$ ; n = 3. **b** Immunostaining of the polypeptidyl-puros (green) and FLAG-CTIF (red) in HeLa cells. As performed in panel **a**, except that the cells were treated with either a lower ( $1 \mu\text{g ml}^{-1}$ ) or higher concentration ( $10 \mu\text{g ml}^{-1}$ ) of puromycin for 1 h before immunostaining. Scale bar, 10  $\mu\text{m}$ ; n = 3.

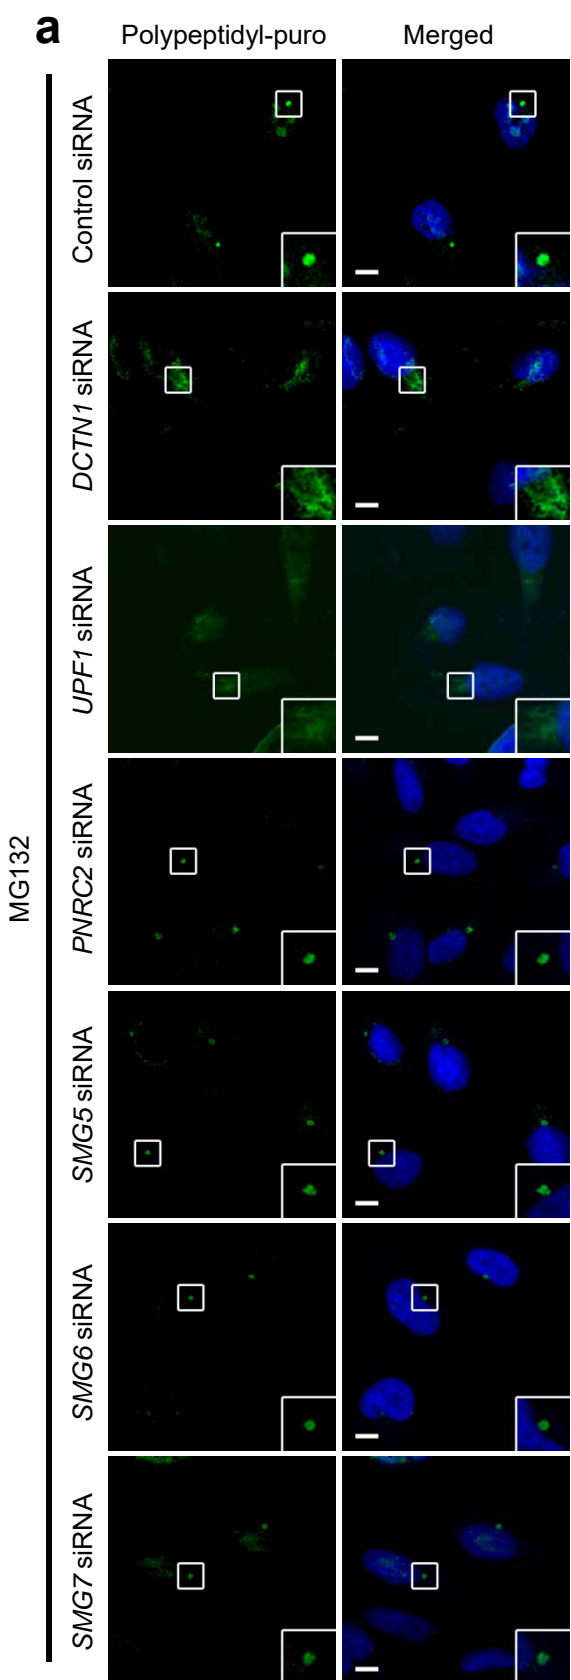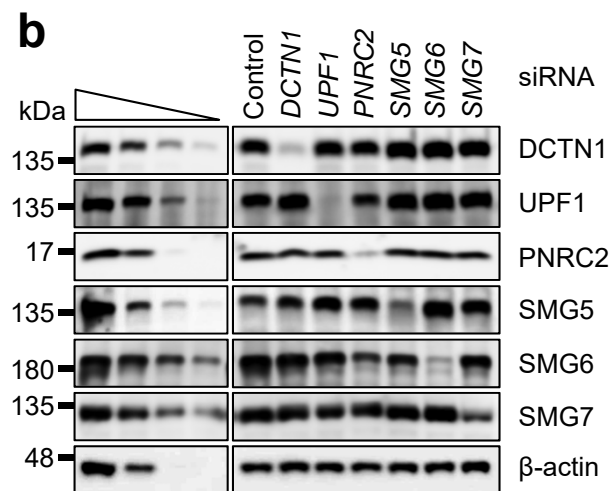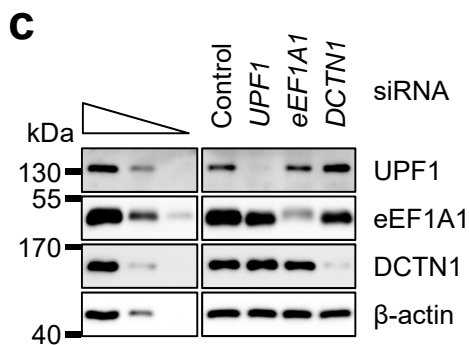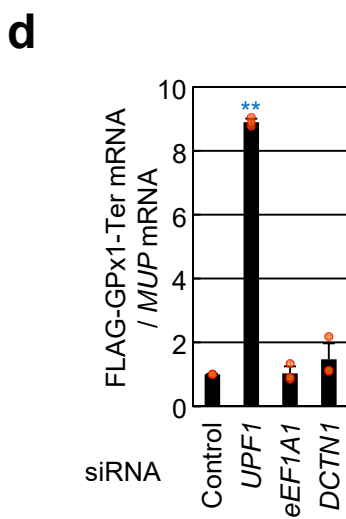

**Supplementary Fig. 3** NMD and the CED-mediated aggresome formation are mechanistically distinct pathways, although they share a common factor, UPF1. **a, b** Effects of downregulation of NMD-related factors on the formation of the aggresome containing polypeptidyl-puro. HeLa cells depleted of the indicated proteins were treated with MG132 for 12 h and puromycin for 1 h before immunostaining. **a** Immunostaining of polypeptidyl-puro. Scale bar, 10  $\mu\text{m}$ ;  $n = 2$ . **b** Western blotting confirming specific downregulation of the indicated proteins;  $n = 2$ . **c, d** The influence of downregulation of CED components on NMD. As performed in Supplementary Fig. 1, except that the cells were depleted of the indicated proteins. **c** Western blotting proving specific downregulation of the indicated proteins;  $n = 3$ . **d** Relative levels of FLAG-GPx1-Ter mRNAs determined by qRT-PCR. Data are presented as mean values  $\pm$  SD. Two-tailed, equal-sample variance Student's *t* test was carried out to calculate the *P* values. **\*\*** $P < 0.000$ . The exact *P* values are provided in a Source Data File;  $n = 3$ . Source data are provided as a Source Data File.

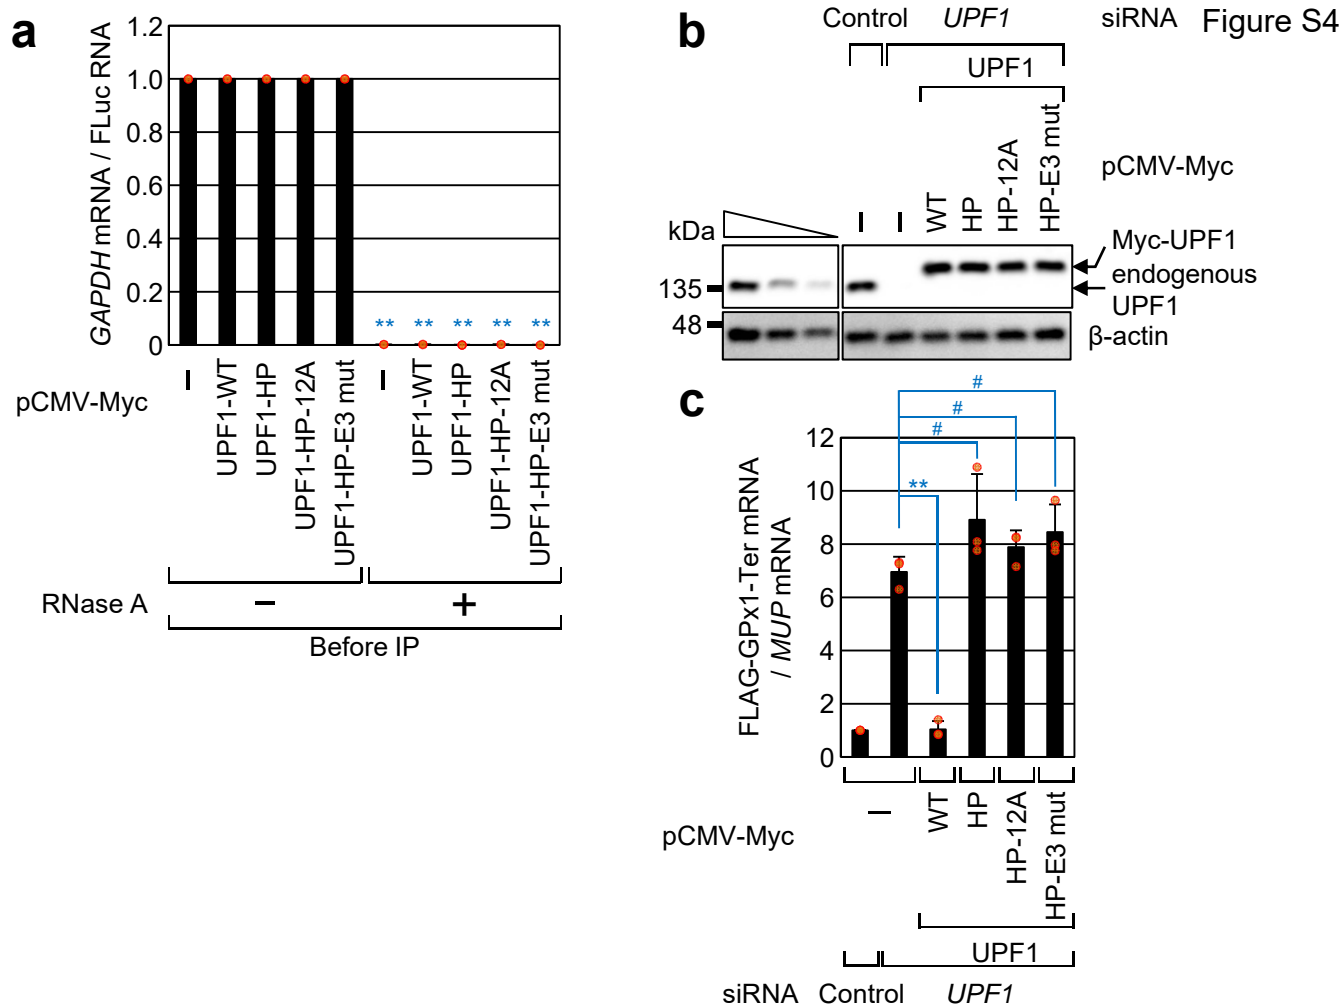

**Supplementary Fig. 4** Confirmation of efficient removal of cellular RNAs by treatment with RNase A, and validation of the function of UPF1-WT and its variants in NMD. **a** Efficient removal of cellular RNAs in Fig. 3a. Total-RNA samples were prepared from the extracts either treated or not treated with RNase A before IPs. After that, equal amounts of *in vitro*-synthesized firefly luciferase (FLuc) RNAs were added to the samples as a spike-in to adjust the data for differences among RNA preparations. The amounts of endogenous *GAPDH* mRNA and FLuc RNA were determined by qRT-PCRs. The levels of *GAPDH* mRNA were normalized to those of FLuc RNA. The normalized levels of *GAPDH* mRNA in the extracts not treated with RNase A were arbitrarily set to 1.0. Two-tailed, equal-sample variance Student's *t* test was carried out to calculate the *P* values.  $**P < 0.0000$ . The exact *P* values are provided in a Source Data File;  $n = 2$ . **b, c** HeLa cells stably expressing CFTR- $\Delta F508$  were either depleted or not depleted of endogenous UPF1. One day later, the cells were retransfected with (i) a plasmid expressing NMD reporter mRNA (either FLAG-GPx1-Norm or -Ter), (ii) a plasmid expressing siRNA-resistant UPF1 (either WT or one of the variants), and (iii) a reference plasmid expressing *MUP* mRNA. Two days later, the cells were harvested, and total-RNA samples and total-protein samples were subjected to qRT-PCRs and Western blotting, respectively. **b** Western blotting showing selective downregulation of endogenous UPF1 and comparable expression levels of exogenous UPF1 and endogenous UPF1;  $n = 3$ . **c** NMD efficiency of FLAG-GPx1 mRNA. The levels of FLAG-GPx1-Norm or -Ter mRNAs were normalized to the levels of *MUP* mRNAs. The relative ratio of normalized FLAG-GPx1-Ter mRNA to normalized FLAG-GPx1-Norm mRNA in the undepleted cells was arbitrarily set to 1.0. Data are presented as mean values  $\pm$  SD. Two-tailed, equal-sample variance Student's *t* test was carried out to calculate the *P* values.  $**P = 0.0001$ . The exact *P* values are provided in a Source Data File; #not significant;  $n = 3$ ; Source data are provided as a Source Data File.

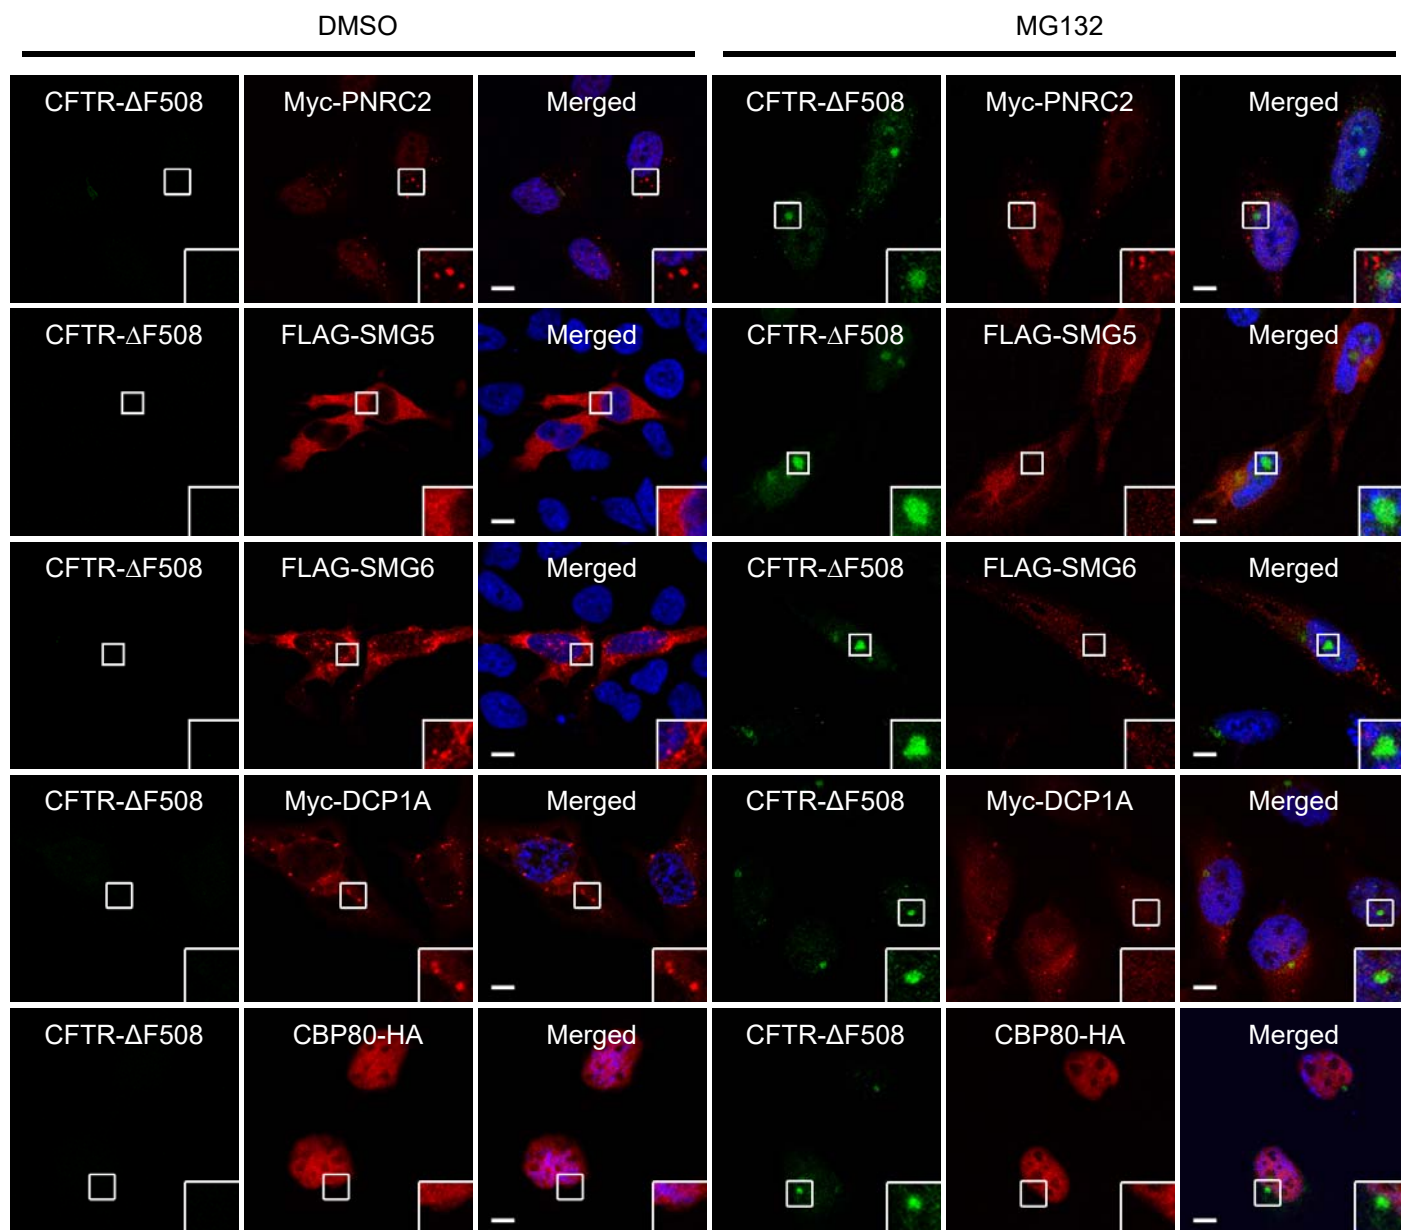

**Supplementary Fig. 5** None of the tested NMD-related factors except UPF1 localizes to the aggresome. HeLa cells stably expressing CFTR- $\Delta$ F508 were transiently transfected with a plasmid expressing the indicated proteins. The cells were treated with either DMSO or MG132 for 12 h before cell fixation. After that, the cells were subjected to conventional confocal microscopy to analyze the immunostaining of CFTR- $\Delta$ F508 (green) and NMD-related factors (red). Scale bar, 10  $\mu$ m; n = 3.



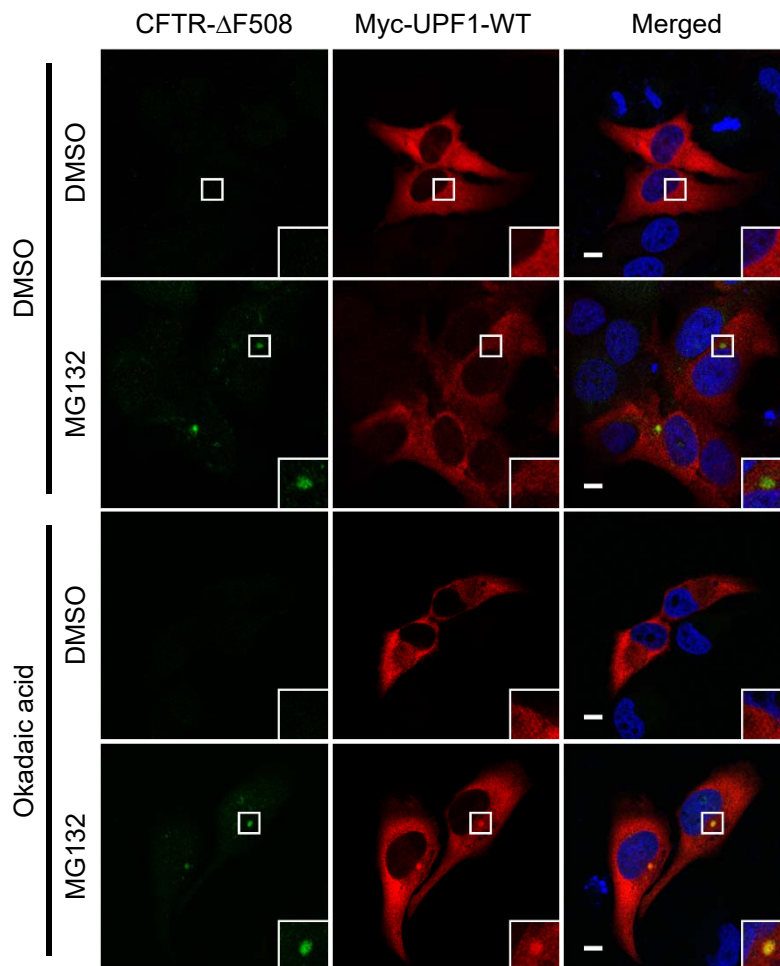

**Supplementary Fig. 6** Okadaic acid treatment leads to aggresomal targeting of UPF1-WT. HeLa cells stably expressing CFTR-ΔF508 were transiently transfected with a plasmid expressing Myc-UPF1-WT. The cells were treated with either DMSO or MG132 for 12 h and okadaic acid for 12 h before cell fixation. After that, the cells were subjected to conventional confocal microscopy to analyze the immunostaining of CFTR-ΔF508 (green) and Myc-UPF1-WT (red). Scale bar, 10 μm; n = 2.

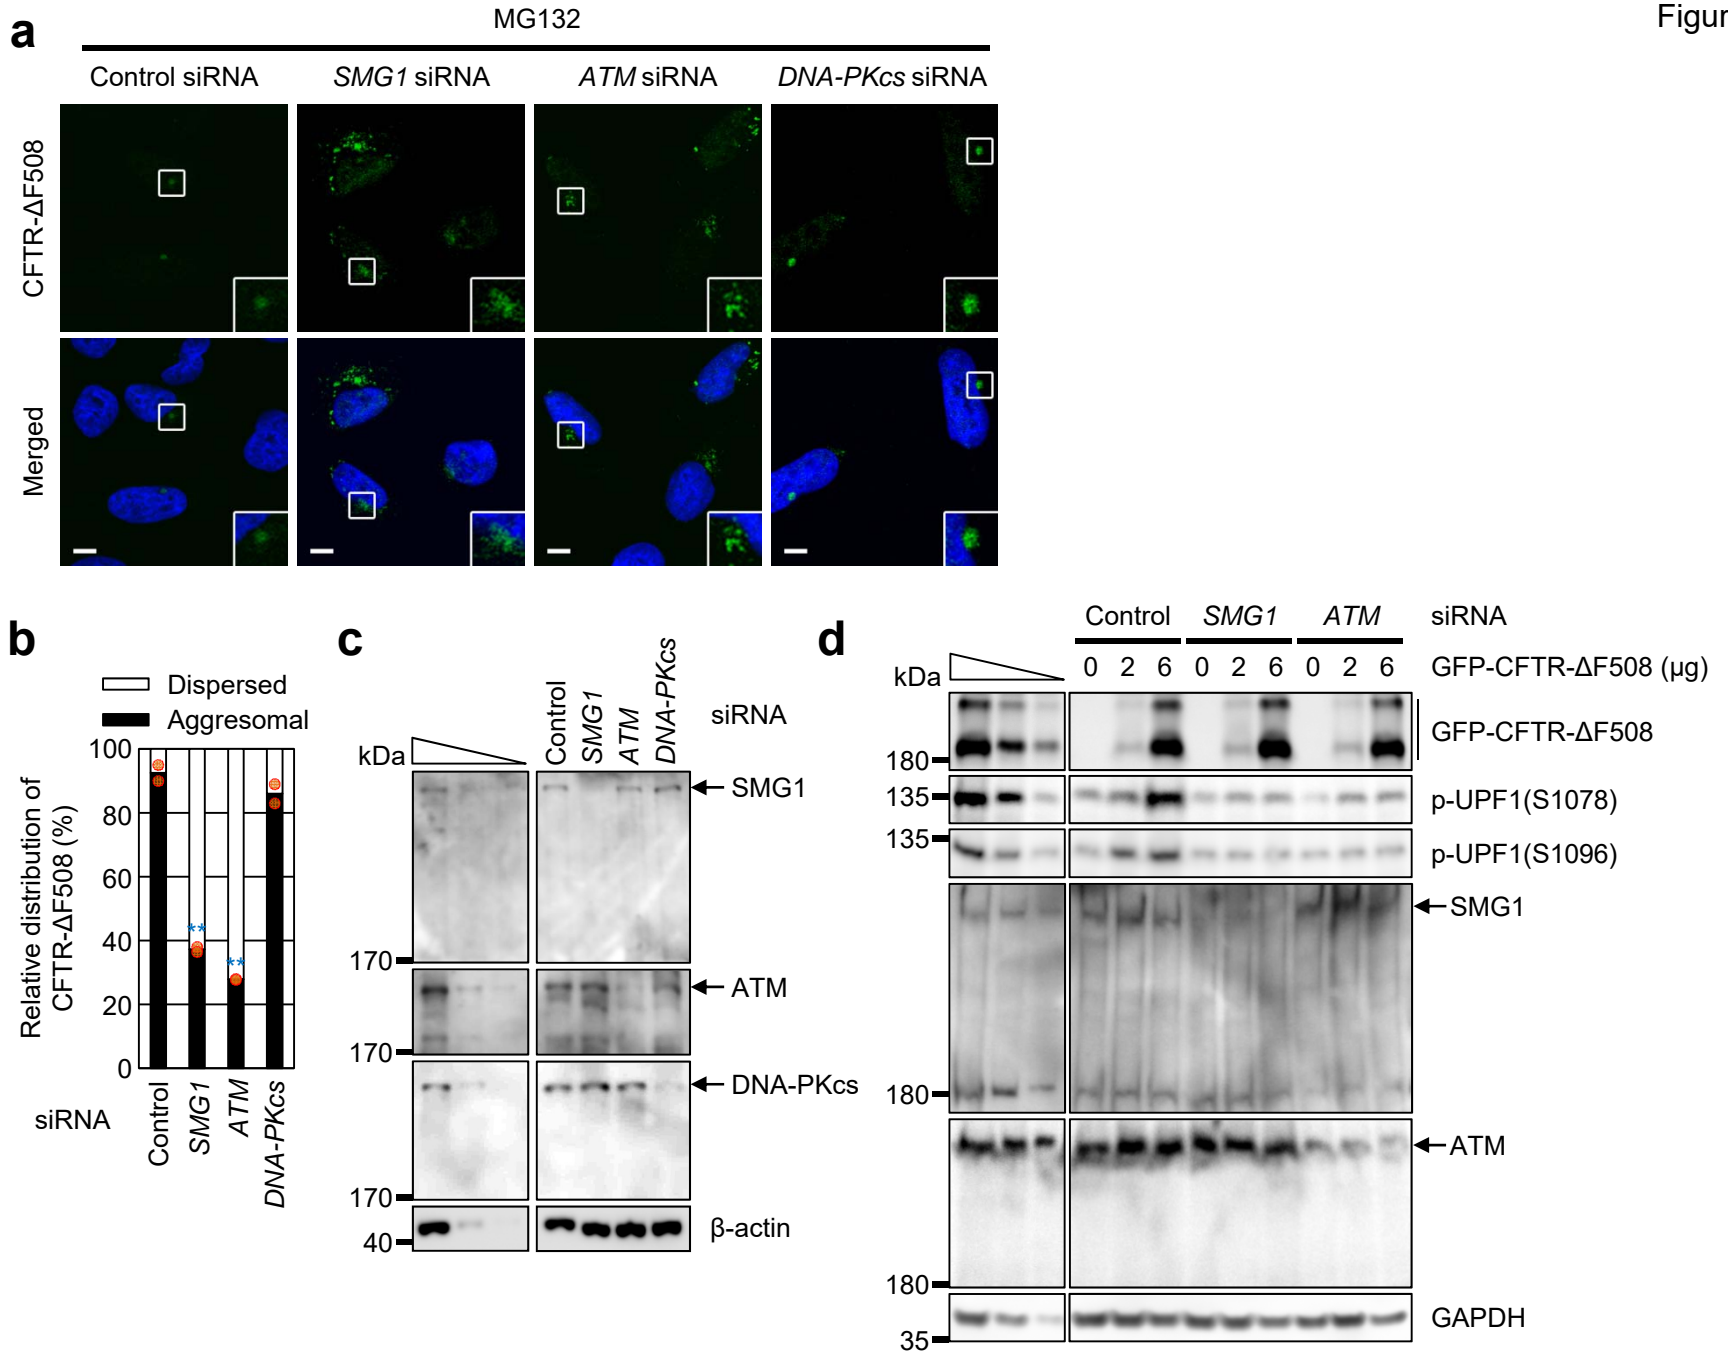

**Supplementary Fig. 7** SMG1 and ATM are involved in aggresome formation. HeLa cells stably expressing CFTR- $\Delta$ F508 were depleted of the indicated proteins. Then, the cells were treated with MG132 for 12 h before cell fixation. **a** Immunostaining of CFTR- $\Delta$ F508. Scale bar, 10  $\mu$ m; n = 2. **b** The relative percentage of the cells containing either the aggresome or dispersed aggregates of CFTR- $\Delta$ F508. As performed in Fig. 2b, except that immunostaining images from panel **a** were analyzed. Two-tailed, equal-sample variance Student's *t* test was carried out to calculate the *P* values. \*\**P* = 0.0022 (*SMG1* siRNA) and 0.0015 (*ATM* siRNA). More than 100 cells were analyzed from each of two independent experiments. **c** Western blots proving specificity of the downregulation; n = 2. **d** Western blots showing an increase in UPF1 phosphorylation via SMG1 and ATM upon overexpression of a misfolded polypeptide (CFTR- $\Delta$ F508); n = 2. Source data are provided as a Source Data File.

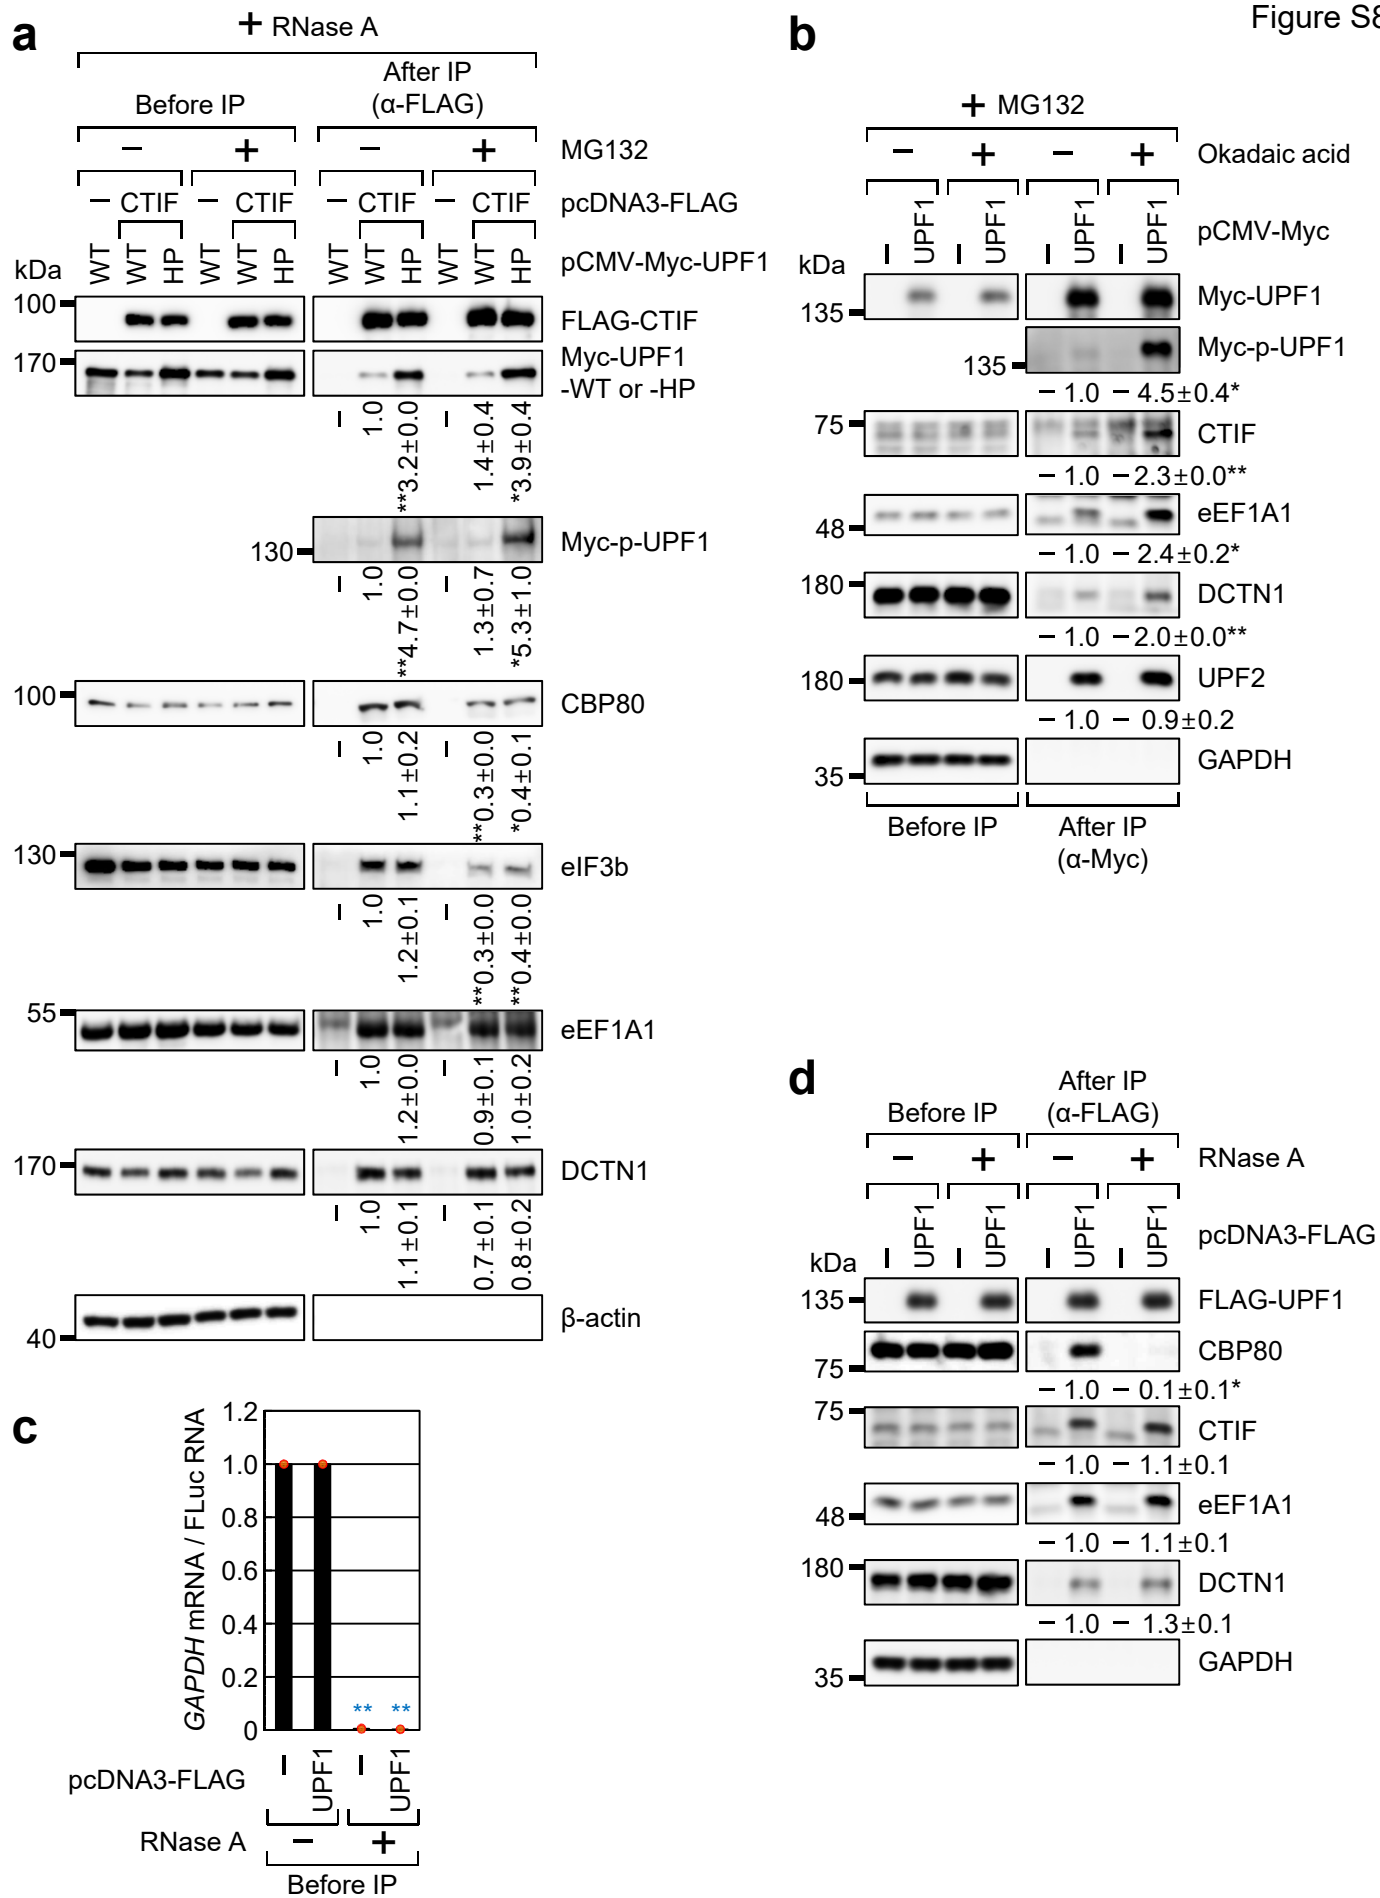

**Supplementary Fig. 8** Hyperphosphorylated UPF1 preferentially binds to the CED complex. **a** IPs of FLAG-CTIF. As performed in Fig. 5a, except that HEK293T cells were transiently cotransfected with plasmids expressing FLAG-CTIF and either Myc-UPF1-WT or -HP. Two-tailed, equal-sample variance Student's *t* test was carried out to calculate the *P* values. \**P* < 0.05; \*\**P* < 0.01. The exact *P* values are provided in a Source Data File; n = 2. **b** IPs of Myc-UPF1 in the lysates of cells either treated or not treated with okadaic acid. HeLa cells stably expressing CFTR-ΔF508 and transiently expressing Myc-UPF1 were either treated or not treated with MG132 for 12 h or okadaic acid for 12 h before cell harvesting. Two-tailed, equal-sample variance Student's *t* test was carried out to calculate the *P* values. \**P* = 0.0105 (Myc-p-UPF1) and 0.0197 (eEF1A1), \*\**P* = 0.0008 (CTIF) and 0.0007 (DCTN1); n = 2. **c, d** IPs of FLAG-UPF1 in the cell extracts treated or not treated with RNase A. The extract of HEK293T cells transiently expressing FLAG-UPF1 was either treated or not treated with RNase A before IPs with the α-FLAG antibody. **c** qRT-PCRs of endogenous *GAPDH* mRNA showing efficient removal of cellular RNAs. As performed in Supplementary Fig. 4a, and the normalized levels of *GAPDH* mRNA in the extracts not treated with RNase A were arbitrarily set to 1.0. Two-tailed, equal-sample variance Student's *t* test was carried out to calculate the *P* values. \*\**P* < 0.0000. The exact *P* values are provided in a Source Data File; n = 2. **d** Western blotting of the indicated proteins in the samples before or after IPs of FLAG-UPF1. Two-tailed, equal-sample variance Student's *t* test was carried out to calculate the *P* values. \**P* = 0.0129 (CBP80); n = 2; Source data are provided as a Source Data File.

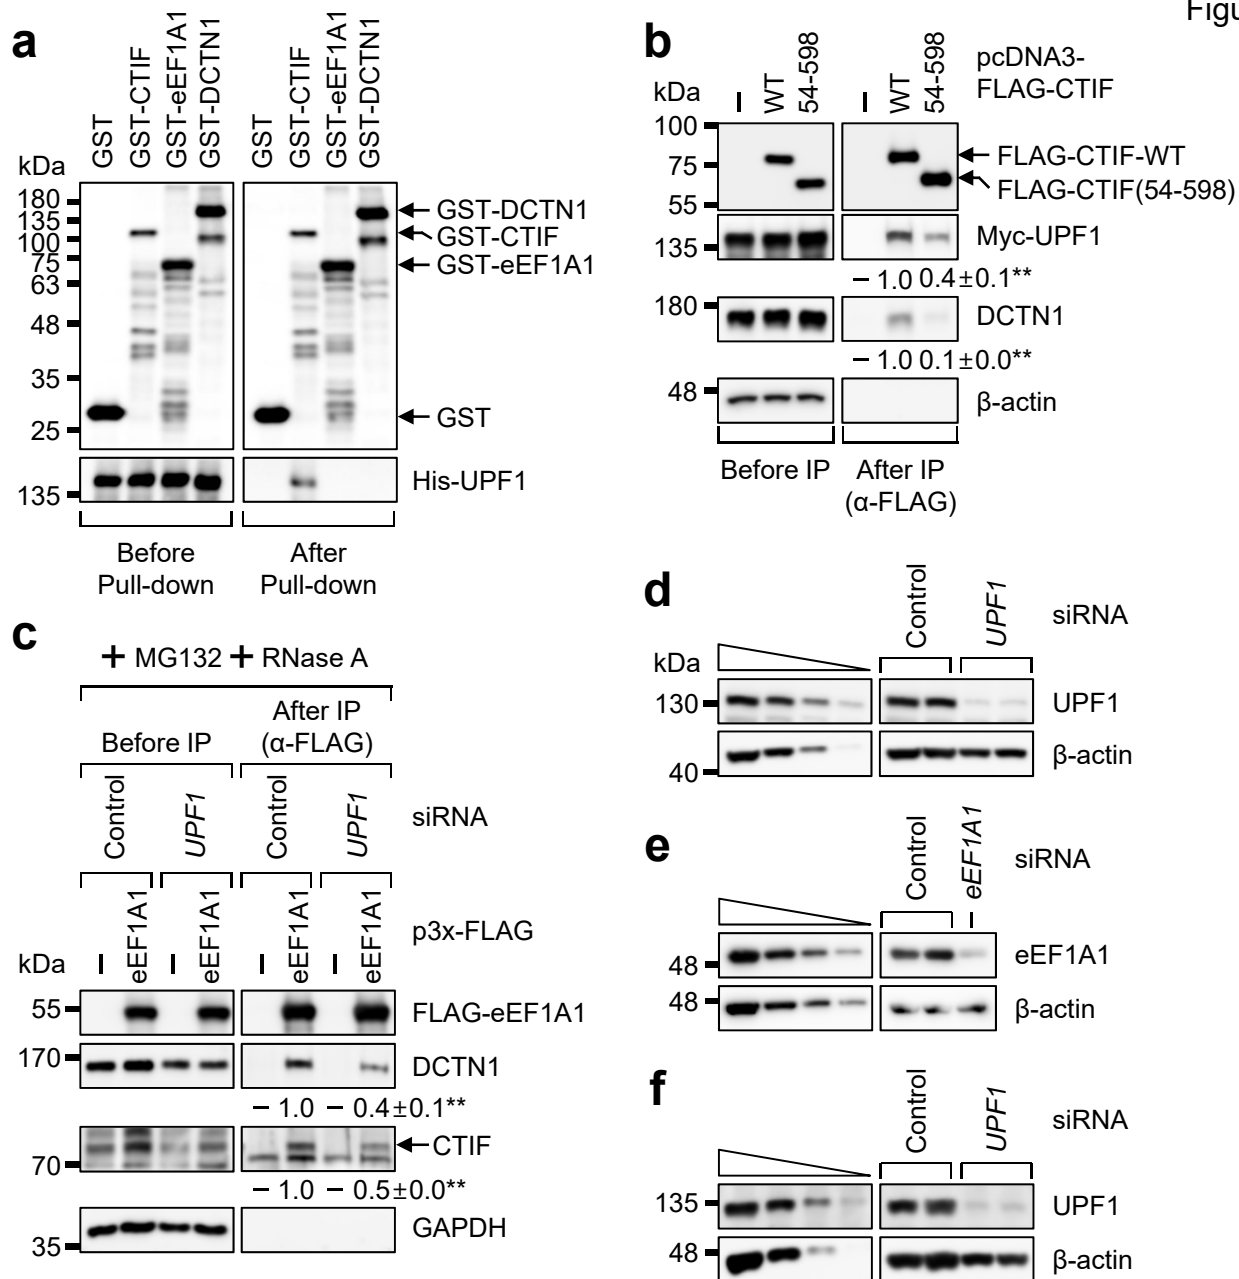

**Supplementary Fig. 9** UPF1 promotes the integrity of the CED complex. **a** *In vitro* GST pull-down assays. A lysate of *E. coli* expressing recombinant His-UPF1 was mixed with a lysate of *E. coli* expressing recombinant GST, GST-CTIF, GST-eEF1A1, or GST-DCTN1. After GST pull-down, the resin-bound proteins were subjected to western blotting with an  $\alpha$ -GST (upper) or  $\alpha$ -His antibody (lower);  $n = 2$ . **b** IPs of FLAG-CTIF-WT or FLAG-CTIF(54-598). HEK293T cells were transiently cotransfected with plasmids expressing either FLAG-CTIF-WT or FLAG-CTIF(54-598) and Myc-UPF1. Two-tailed, equal-sample variance Student's *t* test was carried out to calculate the *P* values. \*\* $P = 0.0077$  (Myc-UPF1), \*\* $P < 0.0000$  (DCTN1). The exact *P* values are provided in Source Data File.  $n = 2$ . **c** IPs of FLAG-eEF1A1 in the lysates of cells depleted of UPF1. As performed in Fig. 5c, except that HEK293T cells were transiently transfected with a plasmid expressing FLAG-eEF1A1. Two-tailed, equal-sample variance Student's *t* test was carried out to calculate the *P* values. \*\* $P = 0.0085$  (DCTN1) and 0.0017 (CTIF);  $n = 2$ . **d** Western blots proving specific downregulation of UPF1 in Fig. 5c;  $n = 3$ . **e** Western blots confirming specific downregulation of eEF1A1 in Fig. 5e;  $n = 2$ . **f** Western blots proving specific downregulation of UPF1 in Fig. 5f;  $n = 2$ ; Source data are provided as a Source Data File.

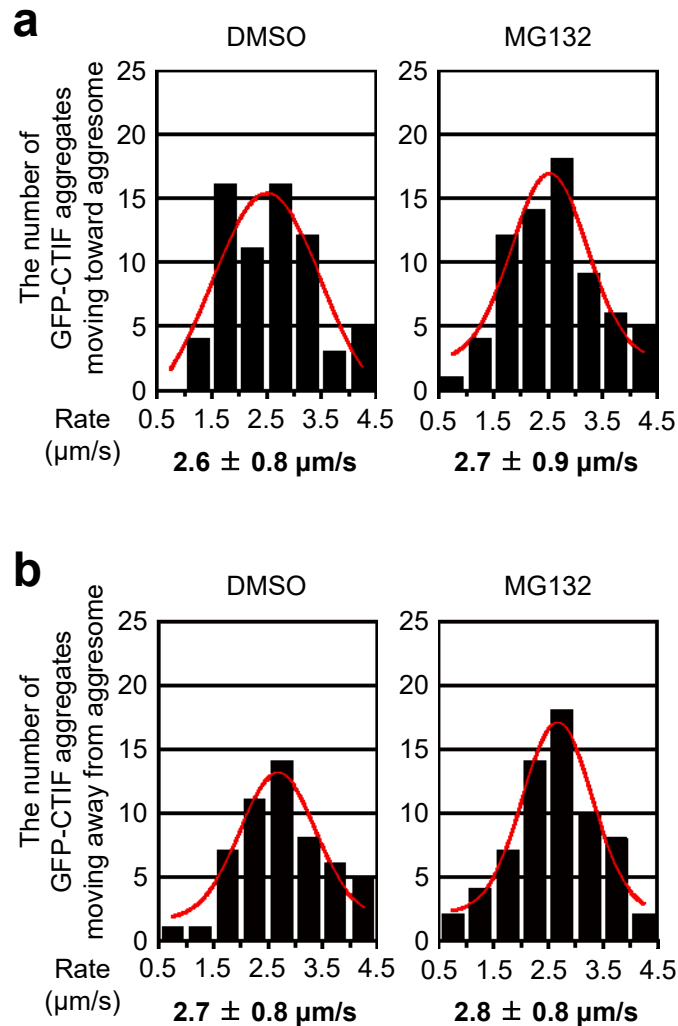

**Supplementary Fig. 10** The translocation rate of GFP-CTIF aggregates in the cells either treated or not treated with MG132. **a** The translocation rate of GFP-CTIF aggregates moving toward aggresomes. The cells were visualized within 2 h after the chemical treatment. In total, 69 and 72 independent GFP-CTIF aggregates observed in three individual cells treated with either DMSO or MG132, respectively, were analyzed. The mean values of the translocation rate are depicted below the graph. **b** The translocation rate of GFP-CTIF aggregates moving away from aggresomes. In total, 65 and 53 independent GFP-CTIF aggregates observed in more than three individual cells treated with either DMSO or MG132, respectively, were analyzed.

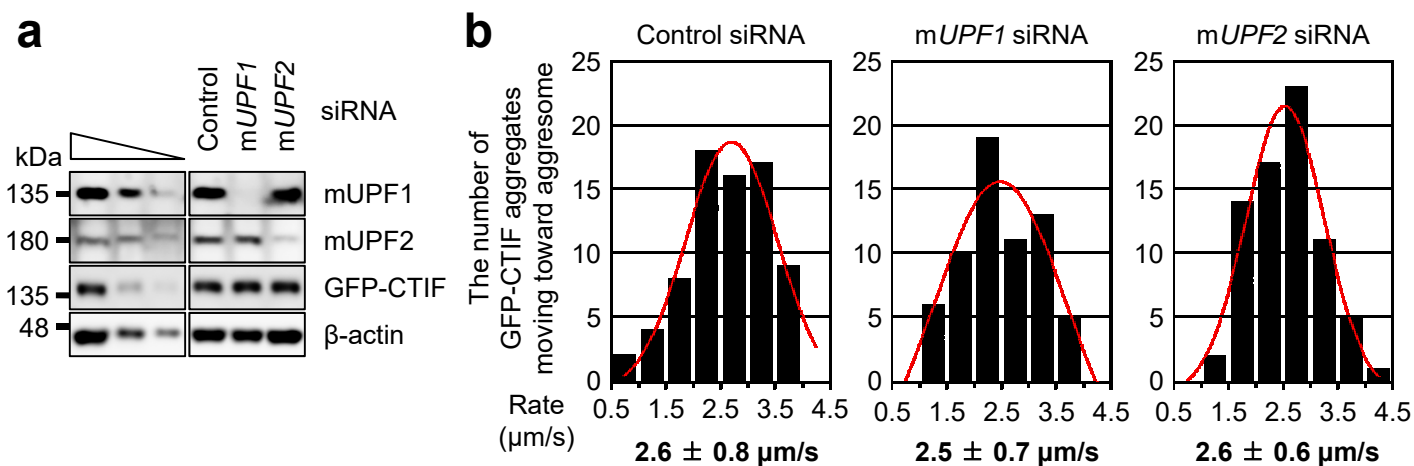

**Supplementary Fig. 11** The translocation rate of GFP-CTIF aggregates in the cells either undepleted or depleted of mUPF1 or mUPF2. **a**, **b** Supporting data for Fig. 6b–e. **a** Western blotting confirming specific downregulation of either mUPF1 or mUPF2. Source data are provided as a Source Data File. **b** The translocation rate of GFP-CTIF aggregates moving toward the aggresome in the cells either undepleted ( $2.6 \pm 0.8 \mu\text{m s}^{-1}$ ; mean  $\pm$  SD) or depleted of mUPF1 ( $2.5 \pm 0.7 \mu\text{m s}^{-1}$ ) or mUPF2 ( $2.6 \pm 0.6 \mu\text{m s}^{-1}$ ). In total, 74 (three undepleted cells), 64 (five mUPF1-depleted cells), and 73 (five mUPF2-depleted cells) independent GFP-CTIF aggregates were analyzed.



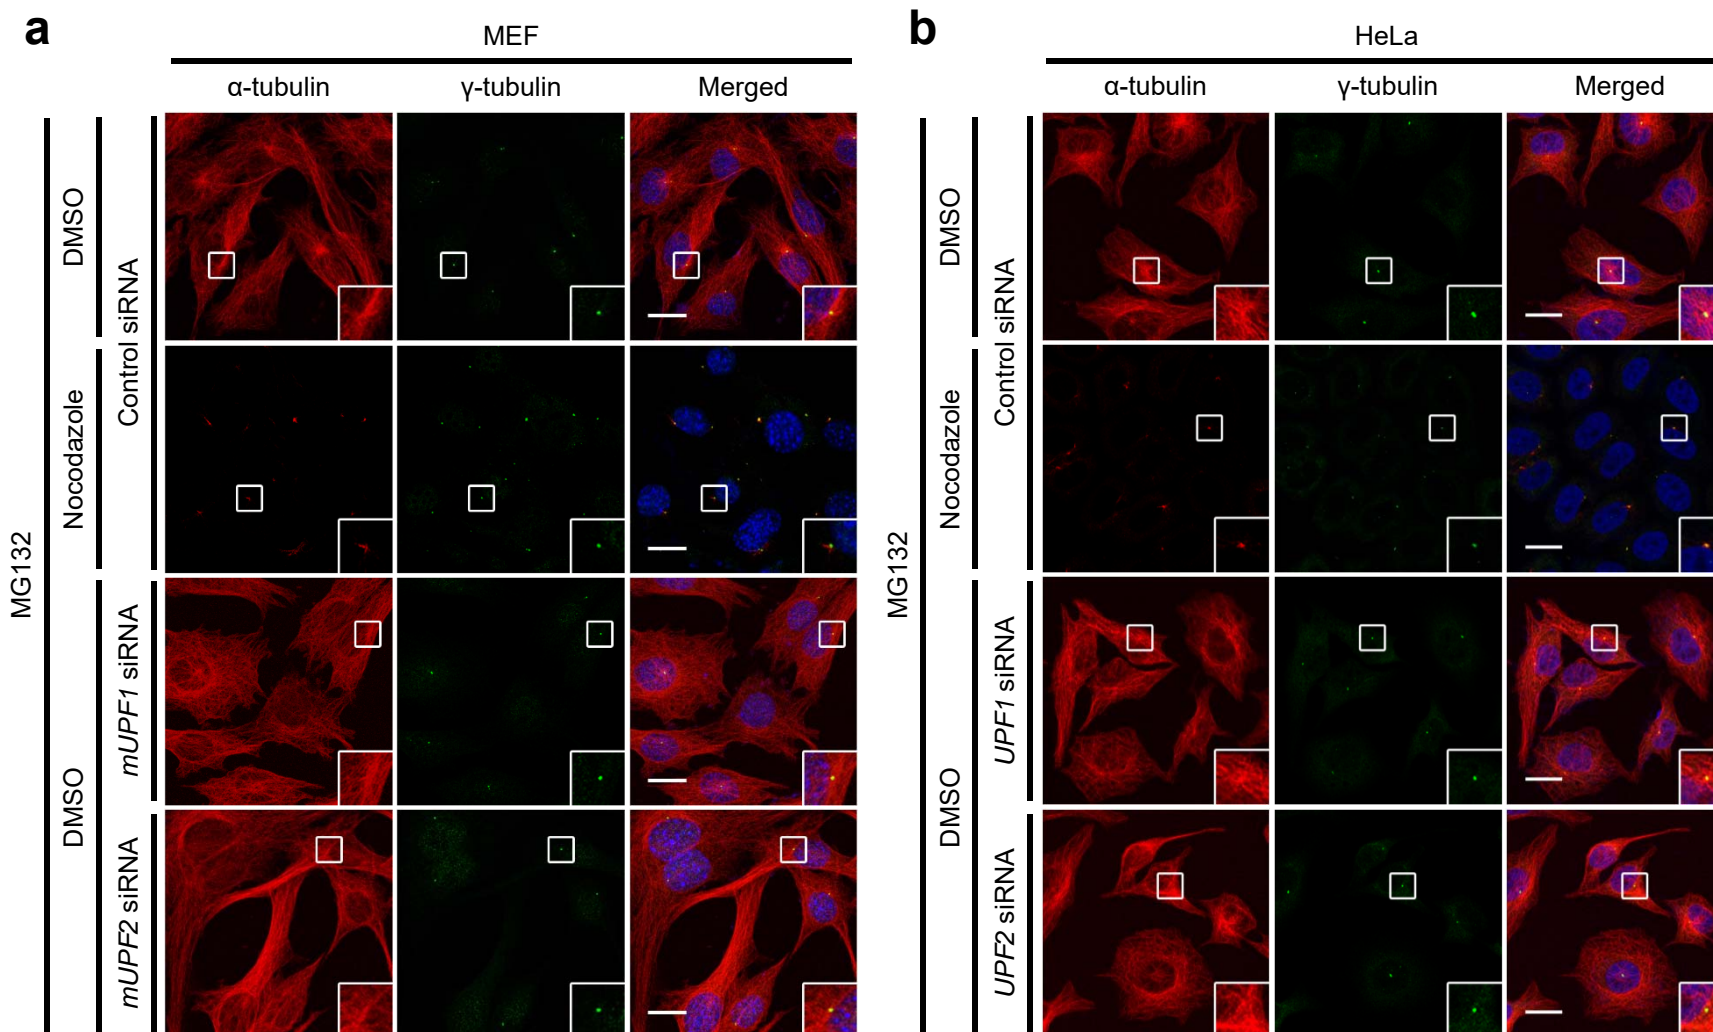

**Supplementary Fig. 12** UPF1 downregulation only marginally affected MTOC and microtubule organization. **a** Immunostaining of  $\alpha$ -tubulin (a component of microtubules; red) and  $\gamma$ -tubulin (a marker of the MTOC; green) in MEFs depleted of either mUPF1 or mUPF2. As a control, the cells were treated with the microtubule-depolymerizing drug nocodazole. Scale bar, 20  $\mu$ m; n = 2. **b** Immunostaining of  $\alpha$ -tubulin (red) and  $\gamma$ -tubulin (green) in HeLa cells depleted of either UPF1 or UPF2. Scale bar, 20  $\mu$ m; n = 2.

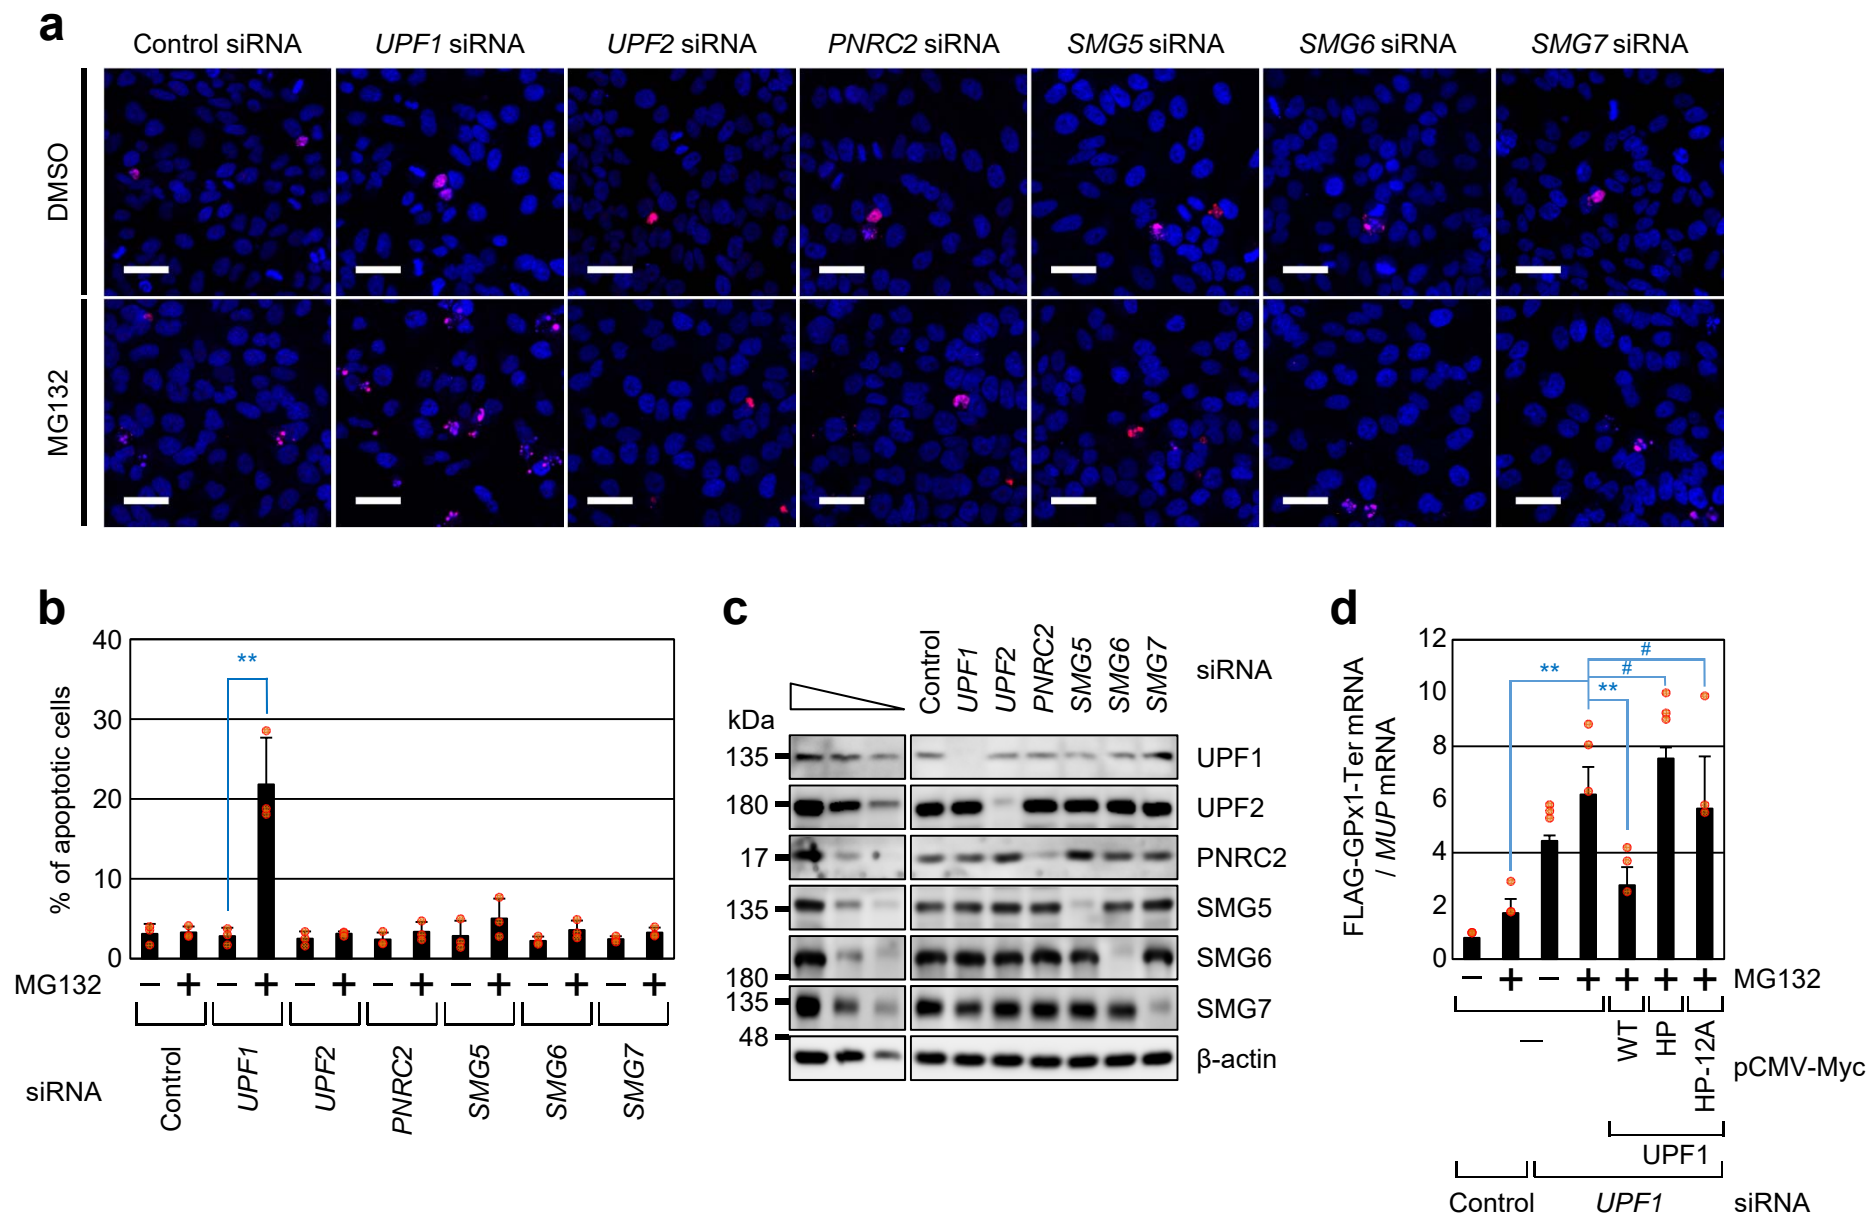

**Supplementary Fig. 13** Inhibition of proteotoxic-stress-induced apoptosis by UPF1 hyperphosphorylation is not relevant to NMD inhibition. **a–c** The influence of downregulation of an NMD factor on the apoptosis induced by proteotoxic stresses. Stably CFTR- $\Delta$ F508-expressing HeLa cells either depleted or not depleted of an endogenous NMD factor. The cells were treated with either DMSO or MG132 for 16 h before cell fixation. Scale bar, 50  $\mu$ m. **a** The population of apoptotic cells was visualized by the TUNEL assay; n = 3. **b** The number of TUNEL-positive cells was determined, and the relative percentage of apoptotic cells is presented. Two-tailed, equal-sample variance Student's *t* test was carried out to calculate the *P* values. **\*\**P* = 0.0052** (*UPF1* siRNA); n = 3. **c** Western blotting showing specific downregulation of an NMD factor; n = 3. **d** NMD efficiency under apoptotic conditions induced by proteotoxic stresses. As performed in Fig. 7a,b, except that the cells were cotransfected with a plasmid expressing either FLAG-GPx1-Norm or -Ter mRNA and a reference plasmid expressing *MUP* mRNA. FLAG-GPx1-Norm and -Ter mRNA levels were normalized to the levels of *MUP* mRNAs. The relative ratio of the normalized FLAG-GPx1-Ter mRNA level to the normalized FLAG-GPx1-Norm mRNA level in the cells not depleted of UPF1 and not treated with MG132 was arbitrarily set to 1.0. Data are presented as mean values  $\pm$  SD. Two-tailed, equal-sample variance Student's *t* test was carried out to calculate the *P* value. **\*\**P* < 0.0089**. The exact *P* values are provided in Source Data File; #not significant; n = 3; Source data are provided as a Source Data File.
